# Supplementary material
Source: MDPI journal article supplement (https://www.mdpi.com/2076-3417/7/8/840)
Supplement: s1 [file s1]

# Supplementary Materials: Effect of Ultrafast Imaging on Shear Wave Visualization and Characterization: An Experimental and Computational Study in a Pediatric Ventricular Model

Annette Caenen, Mathieu Pernot, Ingvild Kinn Ekroll, Darya Shcherbakova, Luc Mertens, Abigail Swillens and Patrick Segers

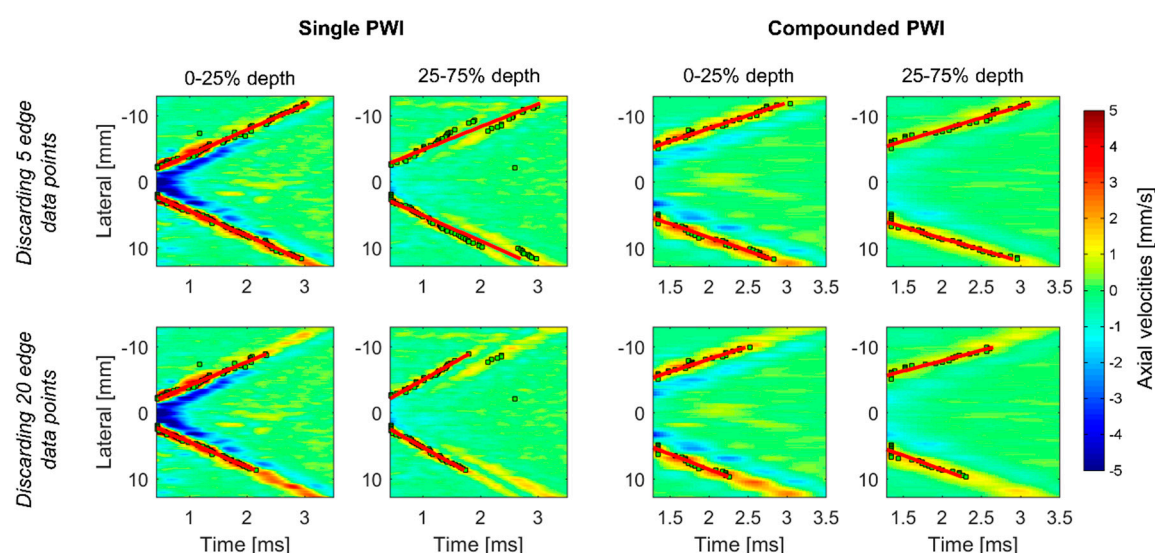

**Figure S1.** Illustration of the effect of discarding 5 or 20 data points at the edges of each shear wave during the fitting procedure in the time-of-flight (TOF) method: a comparison between different depths and imaging acquisitions. The green dots represent tracked maximal axial velocity, whereas the red line represent the linear TOF fit.
